# Supplementary material for: A novel bi-layered asymmetric membrane incorporating demineralized dentin matrix accelerates tissue healing and bone regeneration in a rat skull defect model
Source: Royal Society of Chemistry journal article supplement (doi:10.1039/d4bm00350k), 2024-01-01
Supplement: d4bm00350k1.pdf [file d4bm00350k1.pdf]

## Supplementary Information

### **A novel bi-layered asymmetric membrane incorporated with demineralized dentin matrix accelerates tissue healing and bone regeneration in a rat skull defect model**

Yan-Fei Li<sup>1,2</sup>, Qi-Pei Luo<sup>1</sup>, Yu-Xin Yang<sup>1</sup>, An-Qi Li<sup>1</sup>, Xin-Chun Zhang<sup>1\*</sup>

1. Guanghua School of Stomatology, Hospital of Stomatology, Sun Yat-Sen University; Guangdong Provincial Key Laboratory of Stomatology, Guangzhou 510055, China
2. Department of Stomatology, The Eighth Affiliated Hospital, Sun Yat-Sen University, Shenzhen 518033, China

#### **\*Corresponding author:**

Xin-Chun Zhang

Department of Prosthodontics, Guanghua School of Stomatology, Hospital of Stomatology, Sun Yat-sen University; Guangdong Provincial Key Laboratory of Stomatology, 56 Linyuanxi Road, Guangzhou, Guangdong 510055, China.

Tel: +86 208 380 2805

Fax: +86 208 386 2558

E-mail: [zhxinch@mail.sysu.edu.cn](mailto:zhxinch@mail.sysu.edu.cn)

## Table of contents

|                                                                                                                                        |   |
|----------------------------------------------------------------------------------------------------------------------------------------|---|
| 1. The XRD spectrum of DDM particles (Figure S1).....                                                                                  | 3 |
| 2. Intergroup differences of mechanical properties between different DPP bilayer membranes in the dry state (Figure S2) .....          | 4 |
| 3. Intergroup differences of mechanical properties between different DPP bilayer membranes in the wet state (Figure S3).....           | 5 |
| 4. Intergroup differences of weight loss rate between different DPP bilayer membranes after 24 w in vitro degradation (Figure S4)..... | 6 |
| 5. Intergroup differences of pH value between different DPP bilayer membranes after 24 w in vitro degradation (Figure S5).....         | 7 |

1. **Figure S1.** The XRD spectrum of DDM particles.

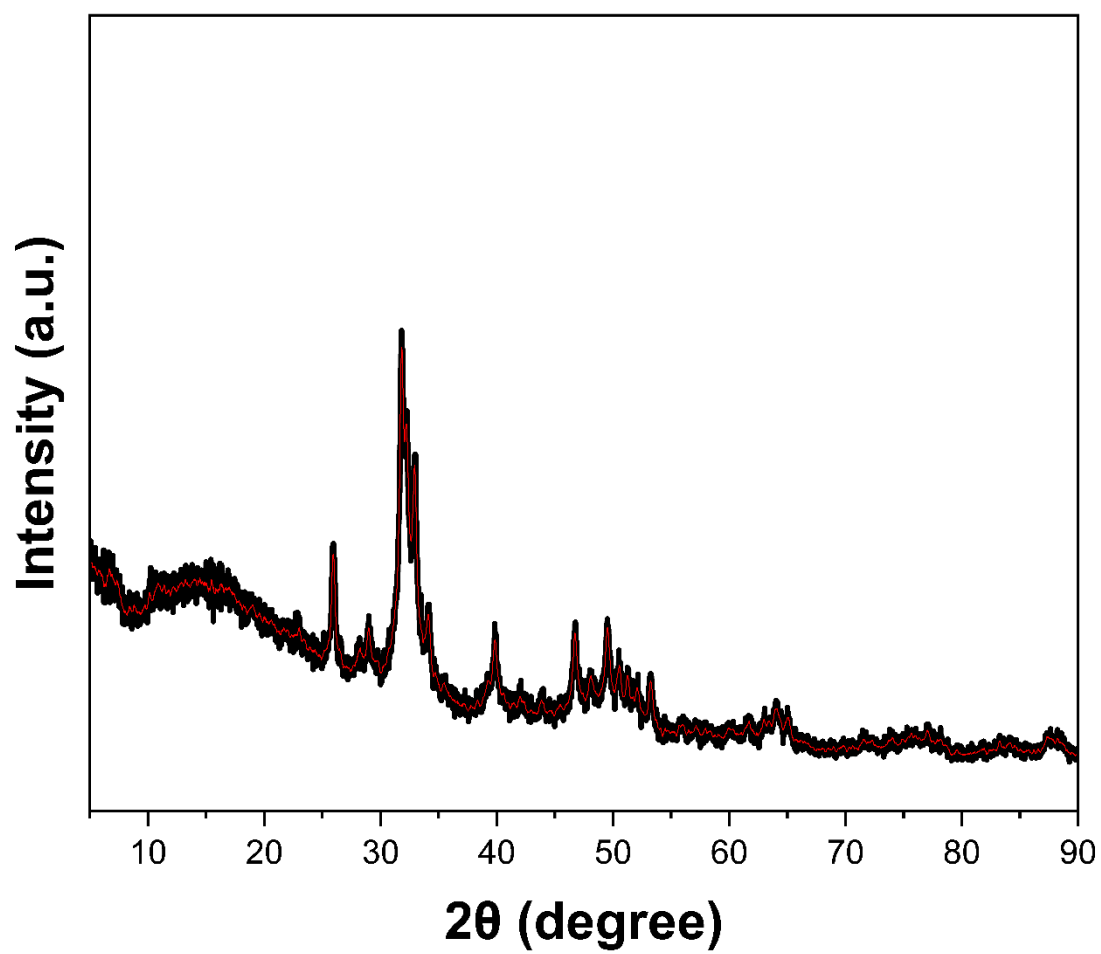

**2. Figure S2.** Intergroup differences of mechanical properties between different DPP bilayer membranes in the dry state.

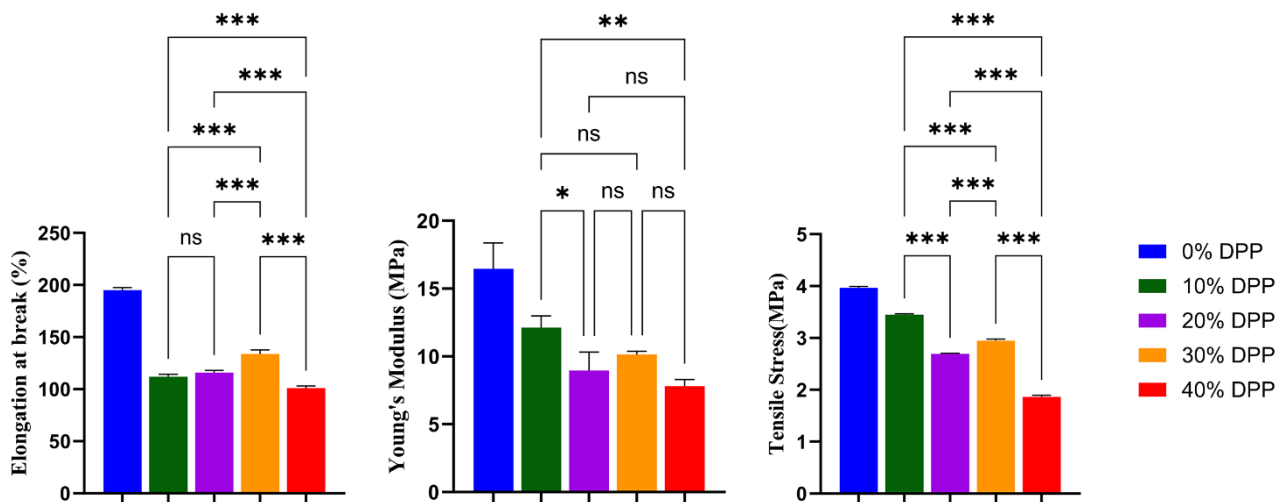

The results were presented as the mean  $\pm$  standard deviation (SD) of at least three different experiments. ns: not significant, \*  $P < 0.05$ , \*\*  $P < 0.01$ , \*\*\*  $P < 0.001$ .

**3. Figure S3.** Intergroup differences of mechanical properties between different DPP bilayer membranes in the wet state.

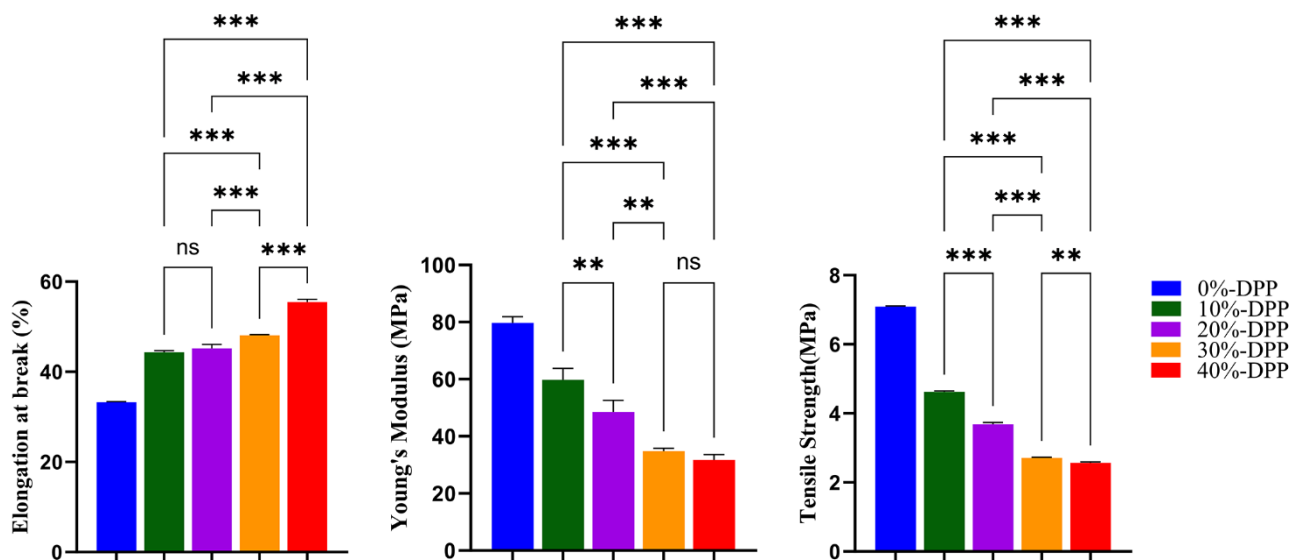

The results were presented as the mean  $\pm$  standard deviation (SD) of at least three different experiments. ns: not significant, \*\*  $P < 0.01$ , \*\*\*  $P < 0.001$ .

**4. Figure S4.** Intergroup differences of weight loss rate between different DPP bilayer membranes after 24 w in vitro degradation.

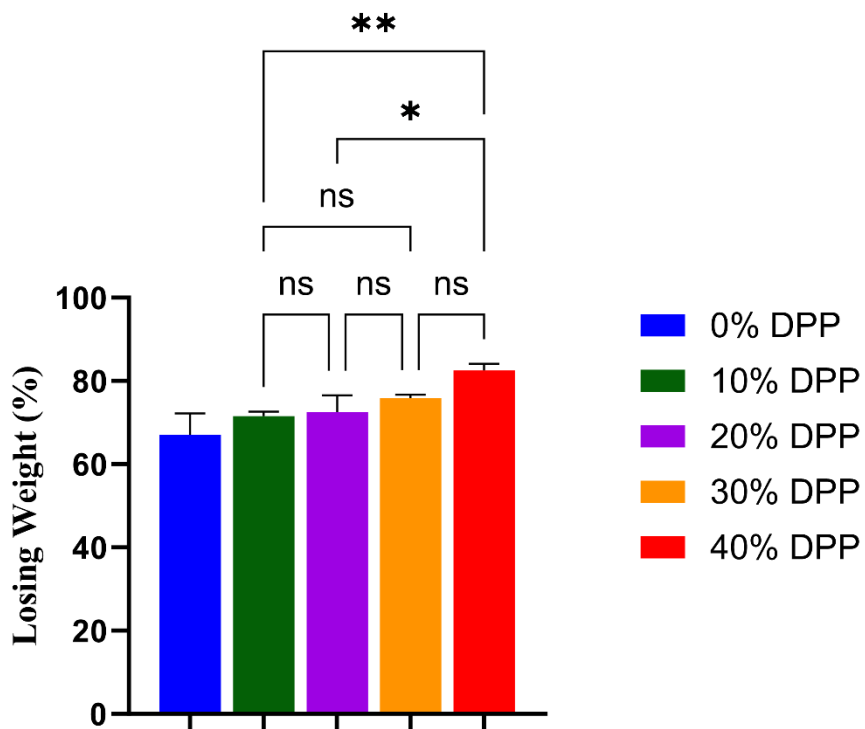

The results were presented as the mean  $\pm$  standard deviation (SD) of at least three different experiments. ns: not significant, \*  $P < 0.05$ , \*\*  $P < 0.01$ .

**5. Figure S5.** Intergroup differences of pH value between different DPP bilayer membranes after 24 w in vitro degradation.

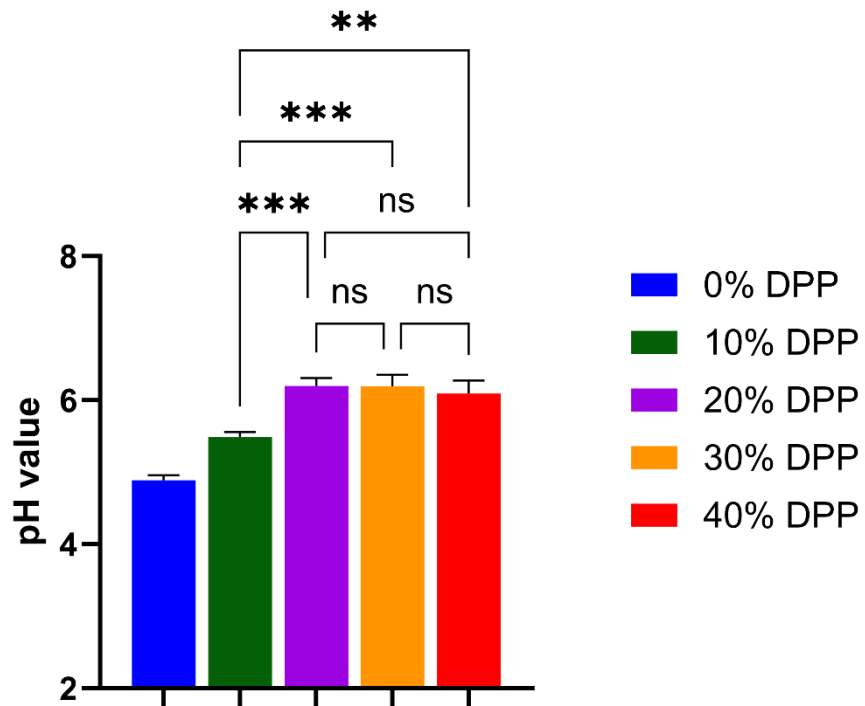

The results were presented as the mean  $\pm$  standard deviation (SD) of at least three different experiments. ns: not significant, \*\*  $P < 0.01$ , \*\*\*  $P < 0.001$ .
